# Supplementary material for: Sex-Dependent Effects of Cadmium Exposure in Early Life on Gut Microbiota and Fat Accumulation in Mice
Source: PubMed Central journal article supplement (PMC5332190; doi:10.1289/ehp360), 2016-09-16
Supplement: EHP360.s001.acco.pdf [file EHP360.s001.acco.pdf]

**Note to readers with disabilities:** *EHP* strives to ensure that all journal content is accessible to all readers. However, some figures and Supplemental Material published in *EHP* articles may not conform to [508 standards](#) due to the complexity of the information being presented. If you need assistance accessing journal content, please contact [ehponline@niehs.nih.gov](mailto:ehponline@niehs.nih.gov). Our staff will work with you to assess and meet your accessibility needs within 3 working days.

## Supplemental Material

### **Sex-Dependent Effects of Cadmium Exposure in Early Life on Gut Microbiota and Fat Accumulation in Mice**

Qian Ba, Mian Li, Peizhan Chen, Chao Huang, Xiaohua Duan, Lijun Lu, Jingquan Li, Rui'ai Chu, Dong Xie, Haiyun Song, Yongning Wu, Hao Ying, Xudong Jia, and Hui Wang

#### Table of Contents

**Figure S1.** Effect of Prenatal Cadmium Exposure on Size at Birth. Female C57BL/6J mice received LDC (0.2, 2, 10, 20, 100, or 500 nM in drinking water) a week before mating and throughout the pregnancy. The body weights (A) and body lengths (B) of the pups were measured at birth. \*,  $p < 0.05$ ; \*\*,  $p < 0.01$  compared with the control.

**Figure S2.** Intestinal Bacteria changes at the genus level in 8-week-old female mice. The fecal microbiota in control and LDC female mice at 8 weeks of age were analyzed and the relative abundance of *Prevotella* (A), *Bifidobacterium* (B) and *Sphingomonas* (C) was shown.

**Figure S3.** Effects of LDC on body compositions in male mice with microbiota removal. (A) Study design: After weaning (3 weeks old), control or LDC male mice (control, n=6; LDC, n=4) were treated with ciprofloxacin (0.2 g/L) and metronidazole (1 g/L) in their drinking water. (B-D) Body composition in the control and LDC mice with antibiotics treatment was measured by NMR at 16 weeks of age. \*\*,  $p < 0.01$  compared with the control group.

**Table S1.** The GO terms of biological process enriched by up-regulated differential genes in LDC male mice.

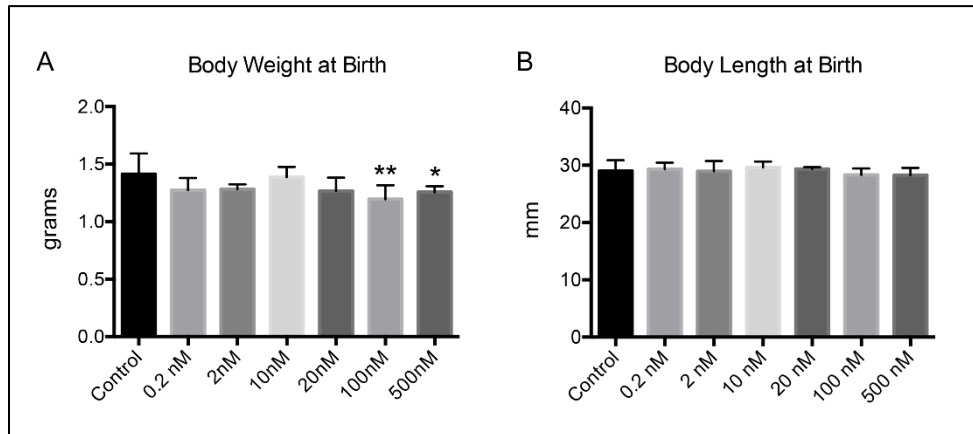

**Figure S1. Effect of Prenatal Cadmium Exposure on Size at Birth.** Female C57BL/6J mice received LDC (0.2, 2, 10, 20, 100, or 500 nM in drinking water) a week before mating and throughout the pregnancy. The body weights (A) and body lengths (B) of the pups were measured at birth. \*,  $p < 0.05$ ; \*\*,  $p < 0.01$  compared with the control.

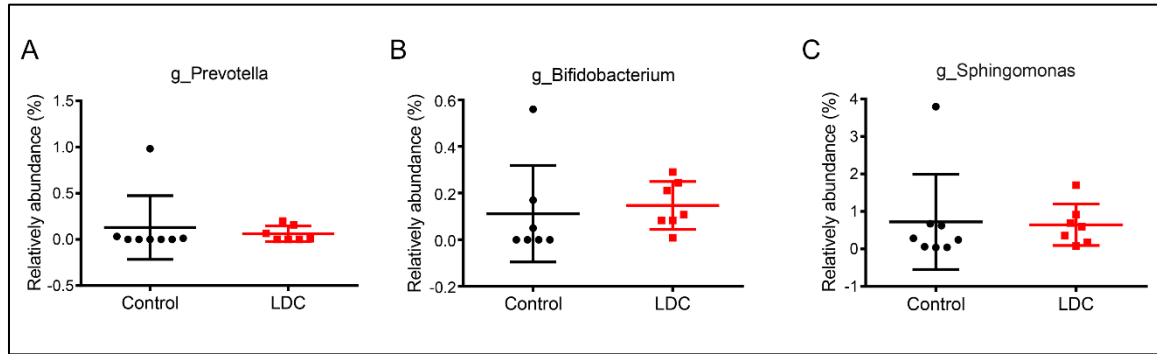

**Figure S2. Intestinal Bacteria changes at the genus level in 8-week-old female mice.** The fecal microbiota in control and LDC female mice at 8 weeks of age were analyzed and the relative abundance of *Prevotella* (A), *Bifidobacterium* (B) and *Sphingomonas* (C) was shown.

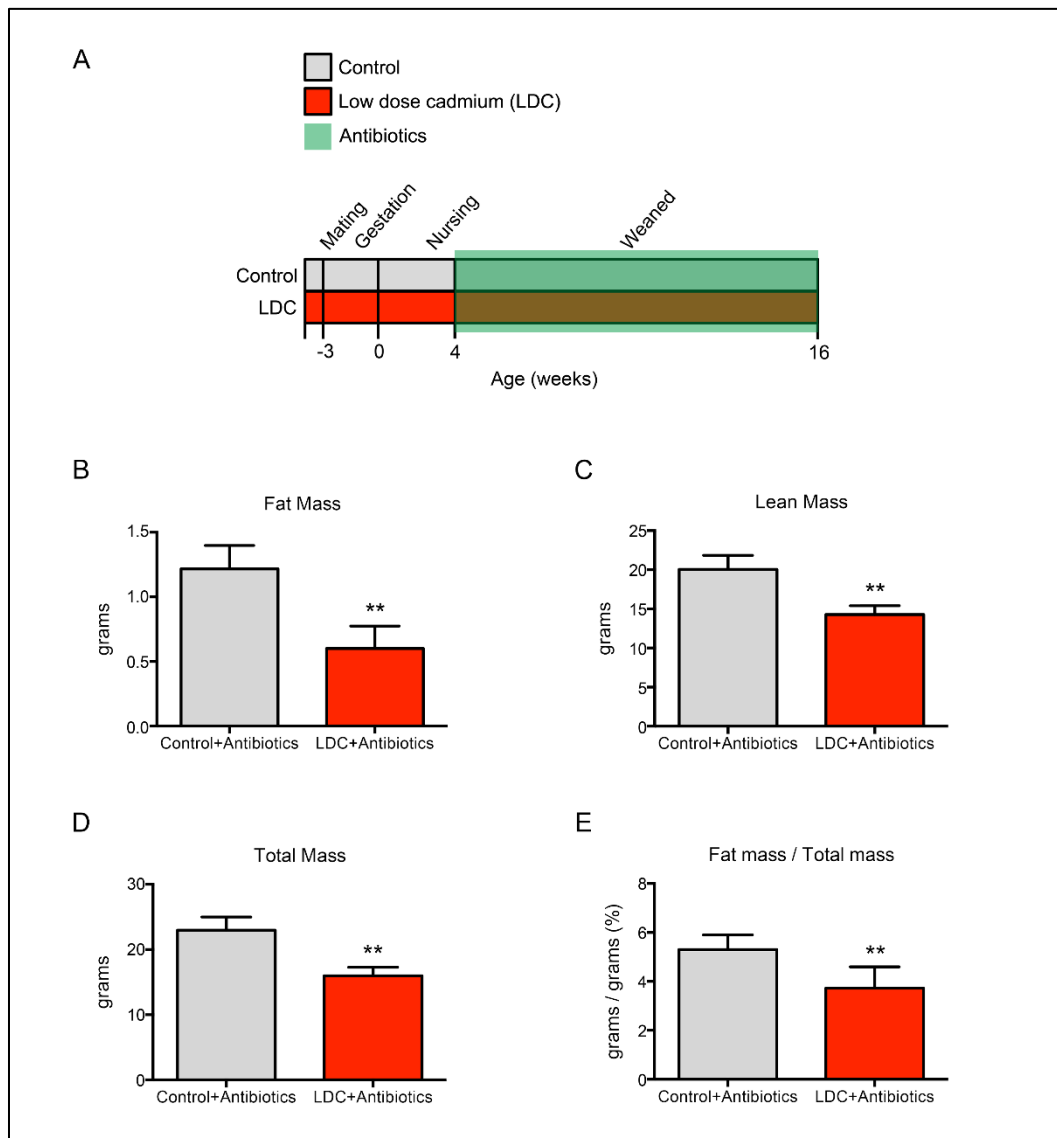

**Figure S3. Effects of LDC on body compositions in male mice with microbiota removal.**

(A) Study design: After weaning (3 weeks old), control or LDC male mice (control, n=6; LDC, n=4) were treated with ciprofloxacin (0.2 g/L) and metronidazole (1 g/L) in their drinking water. (B-D) Body composition in the control and LDC mice with antibiotics treatment was measured by NMR at 16 weeks of age. \*\*,  $p < 0.01$  compared with the control group. (E) Body fat percentage in control and LDC mice with antibiotics treatment was measured. \*\*,  $p < 0.01$  compared with the control group.

**Table S1. The GO terms of biological process enriched by up-regulated differential genes in LDC male mice.**

| <b>GO-ID</b> | <b>P-value</b> | <b>FDR</b> | <b>Description</b>                             |
|--------------|----------------|------------|------------------------------------------------|
| 9987         | 2.49E-06       | 1.70E-03   | cellular process                               |
| 8152         | 1.85E-05       | 6.34E-03   | metabolic process                              |
| 6631         | 7.03E-05       | 1.50E-02   | fatty acid metabolic process                   |
| 61180        | 8.73E-05       | 1.50E-02   | mammary gland epithelium development           |
| 44237        | 1.63E-04       | 2.23E-02   | cellular metabolic process                     |
| 60736        | 3.46E-04       | 3.96E-02   | prostate gland growth                          |
| 32787        | 4.34E-04       | 4.15E-02   | monocarboxylic acid metabolic process          |
| 60749        | 6.75E-04       | 4.15E-02   | mammary gland alveolus development             |
| 6629         | 7.45E-04       | 4.15E-02   | lipid metabolic process                        |
| 44238        | 8.11E-04       | 4.15E-02   | primary metabolic process                      |
| 19752        | 8.38E-04       | 4.15E-02   | carboxylic acid metabolic process              |
| 43436        | 8.38E-04       | 4.15E-02   | oxoacid metabolic process                      |
| 30879        | 8.43E-04       | 4.15E-02   | mammary gland development                      |
| 6082         | 8.47E-04       | 4.15E-02   | organic acid metabolic process                 |
| 42180        | 9.62E-04       | 4.40E-02   | cellular ketone metabolic process              |
| 38           | 1.11E-03       | 4.60E-02   | very long-chain fatty acid metabolic process   |
| 6637         | 1.21E-03       | 4.60E-02   | acyl-CoA metabolic process                     |
| 35383        | 1.21E-03       | 4.60E-02   | thioester metabolic process                    |
| 60560        | 1.31E-03       | 4.73E-02   | developmental growth involved in morphogenesis |
